1 **The VEGAS platform is not suitable for mammalian directed evolution**

2

3 Christopher E. Denes<sup>1,4</sup>, Alexander J. Cole<sup>2,4</sup>, Minh Thuan Nguyen Tran<sup>3</sup>, Mohd Khairul  
4 Nizam Mohd Khalid<sup>3</sup>, Alex W. Hewitt<sup>3</sup>, Daniel Hesselton<sup>2,5</sup>, G. Gregory Neely<sup>1,5</sup>

5

6 <sup>1</sup>The Dr. John and Anne Chong Lab for Functional Genomics, Charles Perkins Centre and  
7 School of Life & Environmental Sciences, The University of Sydney, Sydney, NSW, 2006,  
8 Australia

9 <sup>2</sup>Centenary Institute and Faculty of Medicine and Health, The University of Sydney, Sydney,  
10 NSW, 2006, Australia

11 <sup>3</sup>Menzies Institute for Medical Research, School of Medicine, University of Tasmania,  
12 Tasmania, 7000, Australia

13 <sup>4</sup>These authors contributed equally

14 <sup>5</sup>These authors contributed equally

15 \*Correspondence: [d.hesselton@centenary.org.au](mailto:d.hesselton@centenary.org.au) (D.H.), [greg.neely@sydney.edu.au](mailto:greg.neely@sydney.edu.au)  
16 (G.G.N.)

17

18 ORCIDs:

19 C.E.D.: 0000-0002-8669-8088

20 A.J.C.: 0000-0001-9019-6884

21 M.T.N.T.: 0000-0002-9554-6449

22 M.K.N.M.K.: 0000-0001-7200-3102

23 A.W.H.: 0000-0002-5123-5999

24 D.H.: 0000-0002-8675-9426

25 G.G.N.: 0000-0002-1957-9732

26

27 Keywords: VEGAS, Sindbis virus, directed evolution, replicability, reproducibility

28

29 **Abstract**

30 Directed evolution uses cycles of gene diversification and selection to generate proteins with  
31 novel properties. While traditionally directed evolution is performed in prokaryotic systems,  
32 recently a mammalian directed evolution system (viral evolution of genetically actuating  
33 sequences, or “VEGAS”) has been described. Here we report that this platform has major  
34 technical issues precluding its use for directed evolution. These issues include a rapid loss of  
35 VEGAS system integrity, an inability to propagate VEGAS Sindbis particles across rounds of  
36 transduction, and widespread prevalence of circuit “cheaters”. Similar results have been  
37 obtained in independent labs. It may be possible to use Sindbis virus for mammalian directed  
38 evolution in the future, however, in its reported form, VEGAS is not suitable for use as a  
39 mammalian directed evolution platform.

40

41

42

43

## 44 INTRODUCTION

45 A new generation of mammalian directed evolution systems have been reported, which exploit  
46 viral life cycles to couple mutagenesis of a virally packaged transgene-of-interest with selection  
47 for higher fitness variants (Berman et al. 2018; English et al. 2019). In these systems, essential  
48 structural components are removed from the viral genome and placed under the control of  
49 synthetic gene expression circuits within the host cell and regulated by the transgene-of-  
50 interest. Selection operates on natural mutations arising in the transgene during error-prone  
51 viral replication that then impact the expression of the transgene-regulated viral structural  
52 genes. Variants that more efficiently drive the synthetic circuit are then overrepresented in the  
53 packaged viral particles used for further rounds of evolution (Berman et al. 2018; English et al.  
54 2019). The English, et al. (2019) viral evolution of genetically actuating sequences (VEGAS)  
55 system offered a simplified platform for simultaneous mutagenesis and selection using Sindbis  
56 virus (SINV). The VEGAS system was designed to link the activity of a transgene to expression  
57 of the Sindbis Structural Genome (SSG; comprising Capsid, E3, E2, 6K and E1 genes) (English  
58 et al. 2019). Thus, to apply the selective pressure required for directed evolution, SINV  
59 replication must be dependent on SSG-expression in the mammalian host cell.

60 Here, we find that the VEGAS system does not result in viral propagation across rounds of  
61 replication when performed as described. Investigating why the VEGAS system failed, we  
62 found a rapid loss of system integrity during rounds of replication. While SINV efficiently  
63 packaged a transgene and transduced cells as previously reported (Shapiro et al. 2010; Fayzulin  
64 et al. 2005), we found that propagation beyond this initial transduction event was hijacked by  
65 “cheaters” that packaged SSG components, thereby short-circuiting transgene-dependent  
66 evolution. We conclude that contrary to its initial description, the VEGAS system is not  
67 suitable for mammalian directed evolution.

68

## 69 RESULTS

70 In our efforts to implement the VEGAS system, we first attempted to reproduce SSG-  
71 dependent replication of SINV (Figure 1B from (English et al. 2019)). We electroporated six  
72 independent BHK-21 cultures with pSinHelper, pSinCapsid and pTSin-EGFP seed mRNA  
73 (**Figure S1A**) to package SSG-deficient SINV-EGFP particles. After 24 h, we detected  $4.72 \times$   
74  $10^9 \pm 5.16 \times 10^8$  (SEM) genome copies (gc)/mL in the supernatant (Round (R)0; **Figure 1A**)  
75 and observed bright EGFP fluorescence in most packaging cells (R0; **Figure 1B**). Fresh BHK-

76 21 cultures were transfected with a CMV-SSG plasmid (+SSG) or control DNA (-SSG) and  
77 SINV-EGFP particles were added at a calculated multiplicity of infection (MOI) of 1 gc/cell  
78 (R1; **Figure 1A**). After 24h, viral titers did not show SSG-dependence (-SSG;  $7.35 \times 10^6 \pm$   
79  $2.30 \times 10^5$  gc/mL; +SSG,  $7.33 \pm 4.77 \times 10^5$  gc/mL; **Figure 1A**) and GFP fluorescence was  
80 rarely observed in the transduced cells (**Figure 1B**). Furthermore, these low titers precluded  
81 adding R1 SINV-EGFP particles to R2 cells at an apparent MOI of 1 (see below). Together,  
82 these data show that SINV particles produced using the VEGAS protocol are not generated at  
83 quantities required to perform further rounds of transduction.

84

85 One possible cause for the rapid loss of viral titers observed between R0 and R1 is that  
86 transfected host cells failed to express the Sindbis structural genes provided via DNA plasmid.  
87 Thus, we next examined host cell expression of the CMV-SSG plasmid used in R1. To avoid  
88 the possibility of transfected plasmids contributing to high background signal during qPCR,  
89 we developed a barcoding method to discriminate between plasmid DNA (pDNA) and  
90 expressed mRNA (**Figure S2A**). Using this approach, we confirmed that the CMV-SSG  
91 plasmid was highly expressed (**Figure S2B,C**). We next addressed possible explanations for  
92 the low expression of the SINV-EGFP transgene when transduced at an MOI of 1. We  
93 suspected that residual seed mRNA in the supernatant following R0 transfection could have  
94 been carried over in the R0 output and inflated titers, impeding accurate calculations of MOIs.  
95 To test this, we treated packaged R0 virus samples with RNase A to degrade seed mRNA that  
96 was not protected by encapsidation. Indeed, RNase A treatment of R0 samples decreased the  
97 measured virus titer by 93%, whereas R1 samples, which were not directly exposed to seed  
98 mRNA, were much less RNase-sensitive (**Figure S3**). This differential sensitivity indicated  
99 that residual packaging RNA was present in the output from R0. To determine whether the  
100 inaccurate SINV-EGFP R0 titers were responsible for the lack of SSG-dependent replication,  
101 we added neat (undiluted) packaged SINV-EGFP to CMV-SSG-expressing BHK-21 cells. This  
102 approach produced 5-10% GFP-positive cells at R1 (arrowheads, **Figure 1D**), demonstrating  
103 initial Sindbis packaging was successful, and generated sufficiently high viral titers to test  
104 SSG-dependence at R2 (**Figure 1C**). However, at R2 we still did not observe GFP-positive  
105 cells (**Figure 1D**), consistent with a dramatic drop in viral titers and lack of SSG-dependence  
106 (**Figure 1C**). Overall, initial R0 titer calculations are inflated by contaminating seed RNA  
107 making R1 MOI calculations unreliable. Regardless of this issue, efficient transduction of neat

108 SINV preparations still leads to unproductive replication, indicating that directed evolution  
109 campaigns can not be performed with the VEGAS system in its reported form.

110

111 To investigate the integrity of the VEGAS system over successive rounds of transduction we  
112 performed long-read nanopore sequencing of viral RNA (**Figure 1E**). Using the approach for  
113 transgene recovery as described (English et al. 2019), all reads should map to the transgene  
114 subjected to directed evolution. Surprisingly, we found only 53.4% of reads mapped to the  
115 EGFP transgene in the initial packaged virus (R0; **Figure 1E**) and transgene inclusion was  
116 reduced to 30.3% by R2. The remaining reads mapped to envelope and capsid sequences  
117 derived from the pSinHelper and pSinCapsid plasmids. We note that the *in vitro*-transcribed  
118 VEGAS pSinHelper and pSinCapsid mRNAs retain the SINV NSP1 packaging signal (Weiss,  
119 Geigenmüller-Gnirke, and Schlesinger 1994) (**Figure S4**), which could allow seed mRNA to  
120 compete with the SINV-EGFP transgene for packaging. These data show that on application,  
121 the VEGAS system rapidly loses integrity and preferentially packages SINV structural  
122 elements (cheater particles), further impacting the utility of the VEGAS system as an efficient  
123 tool for mammalian directed evolution.

124

125 Although replication-competent SINV can retain a GFP transgene for at least six viral passages  
126 at low MOIs (0.1 PFU/cell) (Thomas et al. 2003), we next considered the possibility that the  
127 VEGAS system requires selective pressure within a circuit to produce sufficient viral titers to  
128 propagate past R2 and maintain system integrity. To test this, we first validated a simple circuit  
129 whereby a serum response factor DNA-binding domain (SRF)-NLS-VP64 fusion protein  
130 activates a serum response element (SRE)-regulated firefly luciferase reporter (SRE\_LUC)  
131 (**Figure 2A**). In our hands, SRF-NLS-VP64 activated SRE\_LUC similarly to the maximal  
132 activation of SRE-Luciferase previously reported (Figure S3B from (English et al. 2019)),  
133 confirming the integrity of this circuit. Next, we subcloned SRF-NLS-VP64 into the VEGAS  
134 pTSin vector and packaged it in a 1:1 ratio with pTSin-EGFP to provide an evolutionarily  
135 neutral competitor. Under selection, the EGFP transgene should drop out while the higher  
136 fitness SRF-NLS-VP64-containing viruses, capable of driving expression of the Sindbis  
137 structural genome, should rapidly dominate the culture. As predicted, the percentage of GFP-  
138 positive cells decreased with serial passage (**Figure 2B**), however by R2 we still did not detect  
139 SSG-dependent replication (**Figure 2C**). Thus, even this simple VEGAS circuit is not capable

140 of driving the viral replication required for a directed evolution campaign. Importantly, the  
141 circuit-inducing SRF-NLS-VP64 transgene did not outcompete the control EGFP transgene  
142 (3.2% SRF-NLS-VP64 vs 21.7% GFP by R2), and both were rapidly outcompeted by “cheater”  
143 sequences containing the Sindbis structural elements (75.1%, **Figure 2D**). Together, these data  
144 show that even under selective pressure, simple VEGAS feedback circuit components do not  
145 show a selective advantage nor lead to the productive rounds of replication required for directed  
146 evolution campaigns. Instead, these strategies rapidly become “short-circuited” by cheater  
147 particles containing Sindbis structural genes.

148

## 149 **DISCUSSION**

150 While it is possible that undocumented methodological subtleties could explain why VEGAS  
151 Sindbis particles fail to propagate across rounds of transduction, we have thus far not identified  
152 any that could account for the loss of VEGAS system integrity. To generate the Sindbis  
153 particles used to initiate VEGAS campaigns, English *et al.* used the NEON electroporator,  
154 whereas we used the Amaxa electroporator that has previously been used successfully to  
155 deliver RNA to the cytosol (Ekstrom and Dean 2011) and efficiently generate functional  
156 Sindbis particles (Shapiro *et al.* 2010). It is unlikely that using a different electroporator would  
157 explain our inability to run VEGAS directed evolution campaigns, since both machines  
158 produced Sindbis particles that transduced R1 target cells with equivalent efficiency (~5-10%).  
159 Instead, the VEGAS system is non-functional due to technical limitations at R2 and beyond.

160

161 Furthermore, our experiments involved VEGAS components generated and made publicly  
162 available by English *et al.* when provided (Addgene plasmids #127692–127695). Of note, we  
163 could not obtain the CMV-SSG plasmid from English *et al.* and were required to generate this  
164 component ourselves, which we validated and used in Figure 1. Moreover, English *et al.*  
165 similarly did not provide the original VEGAS circuits required to reproduce their original work,  
166 and thus we generated our own serum response factor circuit which we used in Figure 2. Again,  
167 while we confirmed this circuit is functional and could drive expression from the SRE as in  
168 English *et al.*, we found this circuit could not support viral propagation past R2. A similar  
169 inability to use the VEGAS system as described has been observed independently across our  
170 separate laboratories over the 3 years since the platform was first described (English *et al.*  
171 2019). We have consulted with English *et al.* but did not receive advice that resolved these

172 critical technical issues. Together, we conclude that the VEGAS system in its published form  
173 is not suitable for directed evolution campaigns.

174

175 Importantly, as Sindbis virus is pathogenic to humans and has the potential to cause meningitis,  
176 extreme caution should be used when trying to implement the published VEGAS system in a  
177 BSL2 environment since a single recombination event between the transgenic SINV genome  
178 and the host cell SSG expression plasmid (which share homologous sequences) could produce  
179 a replication-competent virus. In our hands we tested for and did not detect competent virus,  
180 however the VEGAS system is almost immediately hijacked by “cheaters” that packaged SSG  
181 components, making it currently unsuitable for directed evolution. While we believe there is a  
182 future for Sindbis-based mammalian directed evolution systems, this will require substantial  
183 efforts to address critical design flaws that limit VEGAS utility. Optimally, any repairs or  
184 upgrades should be confirmed by independent groups prior to publication.

185

186 In summary, although we confirm that packaging and transduction of SINV particles efficiently  
187 delivers transgenes to fresh host cells as previously documented (English et al. 2019; Fayzulin  
188 et al. 2005; Shapiro et al. 2010), we conclude that due to fundamental biological limitations  
189 (lack of virus propagation across rounds, loss of VEGAS system integrity, and widespread  
190 prevalence of circuit “cheaters”), the VEGAS system as published is not suitable for use as a  
191 mammalian directed evolution platform.

192

## 193 **METHODS**

### 194 **Cell Culture**

195 BHK-21 [C-13] cells were purchased from the American Type Culture Collection (#CCL-10).  
196 Cells were grown in a humidified 37°C (5% CO<sub>2</sub>) atmosphere in MEM  $\alpha$  (ThermoFisher,  
197 #32571101) supplemented with 5% HyClone fetal bovine serum (FBS) (Cytiva Life Sciences,  
198 #SH30084.03, AU origin) and 10% tryptose phosphate broth (TPB) (ThermoFisher,  
199 #CM0283B), referred to as BHK-21 Growth Medium. During transduction and recovery, cells  
200 were maintained in serum-free MEM  $\alpha$  with 10% TPB, referred to as BHK-21 Recovery  
201 Medium (Serum-Free).

### 202 **Molecular Biology and Plasmid Construction**

203 All plasmids were designed in SnapGene® (version 5.3.2). Plasmids were generated by PCR  
204 amplification of sequences of interest with Velocity DNA Polymerase (Bioline, #BIO-21099)  
205 using primers synthesized by IDT or restriction enzyme digestion with NEB High-Fidelity  
206 enzymes. Assembly of amplicons was performed using the NEBuilder HiFi DNA Assembly  
207 Master Mix (NEB, #E2621). Assembled products were transformed into NEB® 10-beta  
208 Competent *E. coli* (NEB, #C3019) and selected on LB agar plates (ThermoFisher, #22700025)  
209 supplemented with 100  $\mu$ g/ml ampicillin (Sigma-Aldrich, #A9518). Individual colonies grown  
210 overnight in liquid LB broth (ThermoFisher, #12795-084) supplemented with 100  $\mu$ g/ml  
211 ampicillin were processed with either the ISOLATE II Plasmid Mini Kit (Bioline, #BIO-  
212 52057) for sequence verification, or the PureYield™ Plasmid Maxiprep System (Promega,  
213 #A2393) for transfection and *in vitro* transcription applications. Plasmid constructs were  
214 verified by restriction digestion and Sanger sequencing at the Australian Genome Research  
215 Facility (AGRF). A list of plasmids used and generated in this study is available in  
216 Supplementary File 1 – Plasmid List.

### 217 **mRNA synthesis**

218 mRNA for electroporation and transfection was produced using the mMESSAGE  
219 mMACHINE™ SP6 Transcription Kit (ThermoFisher, #AM1340) from XbaI-linearized SP6-  
220 driven plasmids as outlined previously (English et al. 2019). mRNA concentrations were  
221 calculated using the Qubit™ RNA BR Assay Kit (ThermoFisher, #Q10210). mRNA integrity



222 was assessed by gel electrophoresis (**Figure S1**). mRNA was frozen at  $-80^{\circ}\text{C}$  immediately after  
223 transcription as per (English et al. 2019).

#### 224 **Packaging of SINV Particles (referred to as Round 0 (R0))**

225  $1 \times 10^6$  BHK-21 cells were electroporated with a total of  $7.8 \mu\text{g}$  of mRNA (1:1:1 of pSinHelper,  
226 pSinCapsid and pTSin-EGFP/pTSin-SRF-NLS-VP64) using Amaxa 2B (Lonza) as per the  
227 manufacturer's instructions for BHK-21 cells. The Amaxa electroporator efficiently delivers  
228 SINV RNA into the cell cytosol (Ekstrom and Dean 2011), allowing for the packaging of  
229 mature SINV particles (Shapiro et al. 2010). Electroporated cells were plated in BHK-21  
230 Recovery Medium (Serum-Free). Virus-containing supernatants were collected 24 hours after  
231 mRNA delivery and centrifuged at  $500 \text{ g}$  for 5 minutes to pellet cellular debris. Clarified  
232 supernatants were collected for titration and subsequent transduction experiments.

#### 233 **Viral Titration**

234 Viral supernatants were titrated as outlined by English and colleagues (English et al. 2019).  
235 Following collection and clarification, undiluted SINV-containing supernatants were  
236 combined with the TaqMan™ Fast Virus 1-Step Master Mix (ThermoFisher, #4444434) and  
237 the appropriate primer-probe sets in technical triplicates. Plates were run on a QuantStudio™  
238 7 Flex Real-Time PCR System (ThermoFisher). As described previously, serially diluted *in*  
239 *vitro*-transcribed pTSin mRNA was used as the standard curve (ranging between  $10^3$ - $10^7$   
240 genome copies (gc) per mL) (English et al. 2019). Standard curves were used to determine viral  
241 titers in gc/mL. Primer sequences are listed in Supplementary File 2 – Primer List.

#### 242 **Transduction of Viral Particles (Round 1 (R1)-onwards)**

243 BHK-21 cells were seeded in 6-well plates at  $6.5 \times 10^4$  cells/well, incubated for 24 hours, and  
244 transfected with a total of  $2.5 \mu\text{g}$  of SSG-encoding DNA/well using *TransIT*-2020 Transfection  
245 Reagent (Mirus Bio, #MIR5400) following the manufacturer's recommendations. 6 hours post-  
246 transfection, cells were rinsed twice with DPBS before viral inoculum (either undiluted or  
247 diluted to a calculated MOI of 1 gc/cell) was applied in a  $380 \mu\text{l}$  volume of BHK-21 Recovery  
248 Medium (Serum-Free). Cells were incubated with virus for 1 hour and rinsed twice with DPBS  
249 before  $1.5 \text{ mL}$  BHK-21 Recovery Medium (Serum-Free) was added for a further 23 hours of  
250 incubation. Virus-containing supernatants were collected and processed for titration and  
251 transduction experiments as described in *Packaging of SINV Particles*.

252 We note that recombination between the SINV genome and homologous sequences in the SSG  
253 3'UTR (**Figure S4**) could produce competent viral populations. While this has not been  
254 observed in our independent labs, we urge responsible research practices and approvals for  
255 working in appropriate Biosafety Level 2 facilities, and the application of appropriate testing  
256 protocols for determining replication competency. Assaying viral titer amplification on cells ±  
257 SSG elements in parallel can be used to quickly ascertain structural element dependency status.

## 258 **RNase Digestion**

259 To test if inflated R0 viral titers were a result of residual packaging mRNA, pooled viral  
260 supernatants were digested with 0 or 400 ng RNase A (Macherey-Nagel, #740505.50) for 4  
261 hours at 37°C. Samples were then incubated for 20 minutes at room temperature with 80 units  
262 of RNaseOUT (ThermoFisher, #10777019). Samples were titrated as described in *Viral*  
263 *Titration*. RNase A treatment was not applied to any samples used for subsequent transduction  
264 assays.

## 265 **Barcoded qPCR**

266 RNA was extracted using the FavorPrep™ Blood/Cultured Cell Total RNA Mini Kit (Fisher  
267 Biotec, #FABRK 001-1) and 400 ng of cDNA was synthesized using the iScript™ Select  
268 cDNA Synthesis Kit (Bio-Rad Laboratories, #1708897) on a Mastercycler® nexus PCR  
269 Thermal Cycler (Eppendorf): 42°C for 60 min, 85°C for 5 min. cDNA was produced using two  
270 primers: a specific primer for hamster GAPDH, and a SINV structural genome primer  
271 containing a barcode. To remove residual primers, cDNA was bound to AMPure XP magnetic  
272 beads (Beckman Coulter, #A63881) in 0.75 M LiCl, 20% PEG 8000 buffer at a 1:0.9  
273 DNA:buffer volume ratio, and washed twice with 70% ethanol. qPCR was performed using  
274 SYBR™ Select Master Mix (ThermoFisher, #4472908) following manufacturer's  
275 recommendations in triplicate on a QuantStudio™ 7 Flex Real-Time PCR System  
276 (ThermoFisher). Primer sequences are listed in Supplementary File 2 – Primer List.

## 277 **Luciferase Assay**

278 BHK-21 cells were seeded in 96-well plates at 2200 cells/well. Cells were transfected with a  
279 total 90 ng of plasmid constructs using *TransIT-2020* Transfection Reagent following the  
280 manufacturer's recommendations. After 6 hours, cells were washed twice with DPBS and  
281 switched to BHK-21 Recovery Medium. At 24 hours post-transfection, luciferase activity was

282 assessed using the Dual-Glo Luciferase Assay System (Promega, #E2940) following  
283 manufacturer's recommendations in black-bottom plates. Both Renilla and firefly  
284 luminescence were measured on an Infinite M1000 PRO microplate reader (Tecan). Raw  
285 firefly luminescence values were normalized to Renilla luminescence and log<sub>2</sub>-transformed.

## 286 **Transgene Isolation**

287 Sextuplicate viral supernatants from each round of viral replication were pooled in equal ratios.  
288 Viral RNA from 400 µl aliquots was isolated with the MagMAX™ Viral RNA Isolation Kit  
289 (ThermoFisher, #AM1939) as per the manufacturer's recommendations. Transgene sequences,  
290 situated between nsP4 and the viral 3' untranslated region (UTR) were reverse-transcribed and  
291 PCR-amplified using the SuperScript™ IV One-Step RT-PCR System (ThermoFisher,  
292 #12594025) and the 26S-F primer and pooled SinRev primer. Primer sequences are listed in  
293 Supplementary File 2 – Primer List. Amplicons of the appropriate size range for the transgene  
294 of interest were then gel extracted for nanopore sequencing using the ISOLATE II PCR and  
295 Gel Kit (Bioline, #BIO-52060) (**Figure S5**).

## 296 **Nanopore Sequencing**

### 297 *Sample Processing*

298 Isolated transgene DNA was processed to generate libraries for full-length transgene  
299 sequencing using Oxford Nanopore Technologies (ONT) Flongle flow cells (ONT, FLO-  
300 FLG001). Samples were prepared for sequencing according to the ONT protocol 'Amplicons  
301 by Ligation' (version ACDE\_9064\_V109\_REVP\_14AUG2019). 200 fmol of DNA  
302 (determined following quantification with the Qubit™ dsDNA HS Assay Kit) was processed  
303 using the NEBNext Companion Module for ONT Ligation Sequencing (NEB, #E7180).  
304 Sequencing adapters were added using the Ligation Sequencing Kit (ONT, #SQK-LSK109).

### 305 *Sequencing and Basecalling*

306 Up to 40 fmol of DNA library was loaded onto ONT Flongle flow cells (R9.4.1) in a MinION  
307 Mk1B Sequencer fitted with a Flongle Adapter (ONT). Sequencing was performed using  
308 MinKNOW (ONT, version 4.2.8) under default parameters and the following specified inputs:  
309 kit used, SQK-LSK109; 0.5 hours between MUX scans; basecalling, disabled. A minimum of  
310 120,000 raw reads were obtained for each sample. Raw FAST5 files were processed using

311 Guppy (version 4.5.2) with the minimum q-score set to 7.0. Raw FAST5 and basecalled  
312 FASTQ reads were deposited at the European Nucleotide Archive (PRJEB47639).

### 313 *Alignment*

314 Quality-filtered base-called reads (in FASTQ format) were processed using EPI2ME Desktop  
315 Agent (ONT, version 3.3.0.1031). Reference files, consisting of complete transgene-coding  
316 sequences or helper- and capsid-coding sequences, were uploaded using the Fasta Reference  
317 Upload workflow (v2021.07.15). For each sample, 100,000 reads were aligned to reference  
318 files using the Fastq Custom Alignment workflow (v2021.03.25) using default parameters.

319

### 320 **Microscopy**

321 Phase contrast and EGFP fluorescence images were captured at 5X magnification on an Axio  
322 Vert.A1 FL (Zeiss) fitted with an AxioCam ICM1 camera (Zeiss 60N-C 2/3" 0.63X adapter).  
323 EGFP images were obtained with a BP475/40 excitation and BP530/50 emission filter (FT500  
324 beam splitter). Images were collected using Zen 2 Blue Edition (Zeiss, version 2.0.0.0).

### 325 **Statistics**

326 Statistical analyses were performed in GraphPad Prism 9.2.0 for Mac, GraphPad Software, San  
327 Diego, California USA, [www.graphpad.com](http://www.graphpad.com). Fold-changes in luciferase activity were  
328 statistically analysed with a Brown-Forsythe and Welch ANOVA test, assuming Gaussian  
329 distribution and unequal standard deviations. Means were compared to the control baseline  
330 mean. qPCR data was analysed using multiple student t-test. *p*-values < 0.05 were considered  
331 significant. All data were plotted as mean ± SEM.

### 332 **ACKNOWLEDGMENTS**

333 A.W.H. was supported by National Health and Medical Research Council (NHMRC)  
334 Practitioner Fellowship GNT1150144. D.H. is funded by NHMRC grant GNT1185002 and the  
335 Centenary Institute. G.G.N. is funded by NHMRC grants GNT1107514, GNT1158164,  
336 GNT1158165, GNT1185002, the NSW Ministry of Health, and a kind donation from Dr. John  
337 and Anne Chong. Figure schematics were created with BioRender.com.

338

339

340 **AUTHOR CONTRIBUTIONS**

341 Conceptualization, CED, AJC, DH, GGN; Methodology, CED, AJC, MTNT, DH;  
342 Investigation, CED, AJC; Resources, AWH, GGN; Data analysis, CED, AJC, MKNMK,  
343 MTNT, DH; Writing - original draft, CED, AJC, MTNT, DH; Writing - review & editing,  
344 CED, AJC, MTNT, MKNMK, AWH, DH, GGN; Supervision and project administration,  
345 AWH, DH, GGN; Funding acquisition, AWH, DH, GGN.

346

347 **DECLARATION OF INTEREST**

348 The authors declare no competing interests.

349

350 **INCLUSION AND DIVERSITY**

351 One or more of the authors of this paper self-identifies as a member of the LGBTQ+  
352 community.

353

354

355 **FIGURE LEGENDS**

356 **Figure 1. VEGAS generates unproductive transductions.**

- 357 A. Viral titers after packaging and transduction of pTSin-EGFP into control or SSG-  
358 expressing BHK-21 cells (N = 6). Horizontal gray bars indicate the batch-specific  
359 thresholds for viral detection.
- 360 B. Phase contrast and EGFP fluorescence images of BHK-21 cells used for packaging (R0)  
361 and transduction (R1 [MOI 1]). Scale bars represent 200  $\mu\text{m}$ .
- 362 C. Viral titers after transduction with undiluted R0 virus into SSG-expressing BHK-21  
363 cells. At R2, viruses were transduced at MOI 1 into control or SSG-expressing BHK-  
364 21 cells (N = 6).
- 365 D. Phase contrast and EGFP fluorescence images of BHK-21 cells transduced with  
366 undiluted R0 virus (R1 [Neat]) and MOI 1 at R2. Scale bars represent 200  $\mu\text{m}$ . White  
367 arrowheads indicate EGFP-positive cells. Green boxes denote a magnified section of  
368 the image with enhanced brightness and contrast to highlight GFP-positive cells.
- 369 E. Nanopore sequencing of viral RNA isolated from pooled samples in Panels C and D (N  
370 = 6). Reads (~100,000 per sample) were aligned to viral reference sequences.

371

372 **Figure 2. Selective pressure does not rescue system integrity.**

- 373 A. Activation of an SRE-regulated luciferase reporter (SRE\_LUC) by SRF-NLS-VP64.  
374 Error bars represent mean  $\pm$  SEM (N = 3, with 3 technical replicates). A Brown-  
375 Forsythe and Welch ANOVA test was used to determine statistical significance. \*\*\*\*  
376  $p < 0.0001$ .
- 377 B. Phase contrast and EGFP fluorescence images of BHK-21 cells at R0-R2 for an SRF-  
378 NLS-VP64/SRE\_SSG circuit. Scale bars represent 200  $\mu\text{m}$ .
- 379 C. Viral titers of an SRF-NLS-VP64 transgene-carrying virus packaged in a 1:1 ratio with  
380 an EGFP-carrying virus (N = 6).
- 381 D. Nanopore sequencing of viral RNA isolated from pooled samples (N = 6). Reads  
382 (~100,000 per sample) were aligned to viral reference sequences.

383

384

385

386 **SUPPLEMENTAL FIGURE LEGENDS**

387 **Figure S1. Integrity of *in vitro*-transcribed mRNA.**

- 388 A. Gel electrophoresis of VEGAS *in vitro*-transcribed mRNA.  
389 B. Gel electrophoresis of *in vitro*-transcribed mRNA used for SRF-NLS-VP64 selection  
390 circuit.

391

392 **Figure S2. Expression of the SSG in transfected BHK-21 cells.**

- 393 A. Schematic of the barcoded qPCR method used to discriminate mRNA from pDNA  
394 during transient transfection. A barcoded SSG-specific primer was used for reverse  
395 transcription. Unincorporated barcoded primers were depleted by bead clean-up  
396 (indicated by gray circles). qPCR was performed using an SSG-specific forward primer  
397 and a barcode-specific reverse primer to discriminate between SSG cDNA and residual  
398 pDNA.  
399 B. Raw Ct values from barcoded qPCR for SSG expression of the CMV-SSG plasmid in  
400 BHK-21 cells,  $\pm$  reverse transcription (RT). t-tests were used to determine statistical  
401 significance. \*\*\* $p < 0.001$ , ns = non-significant.  
402 C. SSG expression was calculated relative to GAPDH. Error bars represent mean  $\pm$  SEM  
403 (N = 3). t-tests were used to determine statistical significance. \* $p < 0.05$ .

404

405 **Figure S3. RNase A-digested R0 and R1 viruses.**

406 Pooled SINV from R0 and R1 (N = 6, produced on +SSG BHK-21 cells) were treated with  
407 RNase A and titrated.

408

409 **Figure S4. Packaging signal alignment in seed mRNA sequences.**

410 Schematic showing the position of the SINV packaging signal within VEGAS seed mRNAs  
411 (asterisks). Genes and truncations drawn to scale.

412

413 **Figure S5. Isolated transgene RT-PCR amplicons for nanopore sequencing.**

- 414 A. Transgenes from electroporated VEGAS viruses (from Figure 1) were amplified by RT-  
415 PCR (boxed in red) and gel extracted for nanopore sequencing.  
416 B. Transgenes from the SRF-NLS-VP64/SRE\_SSG circuit (from Figure 3C) were  
417 amplified by RT-PCR (boxed in red) and gel extracted for nanopore sequencing.

418

419

420

421

422

423

424

425

426

427

428 **MAIN FIGURES**

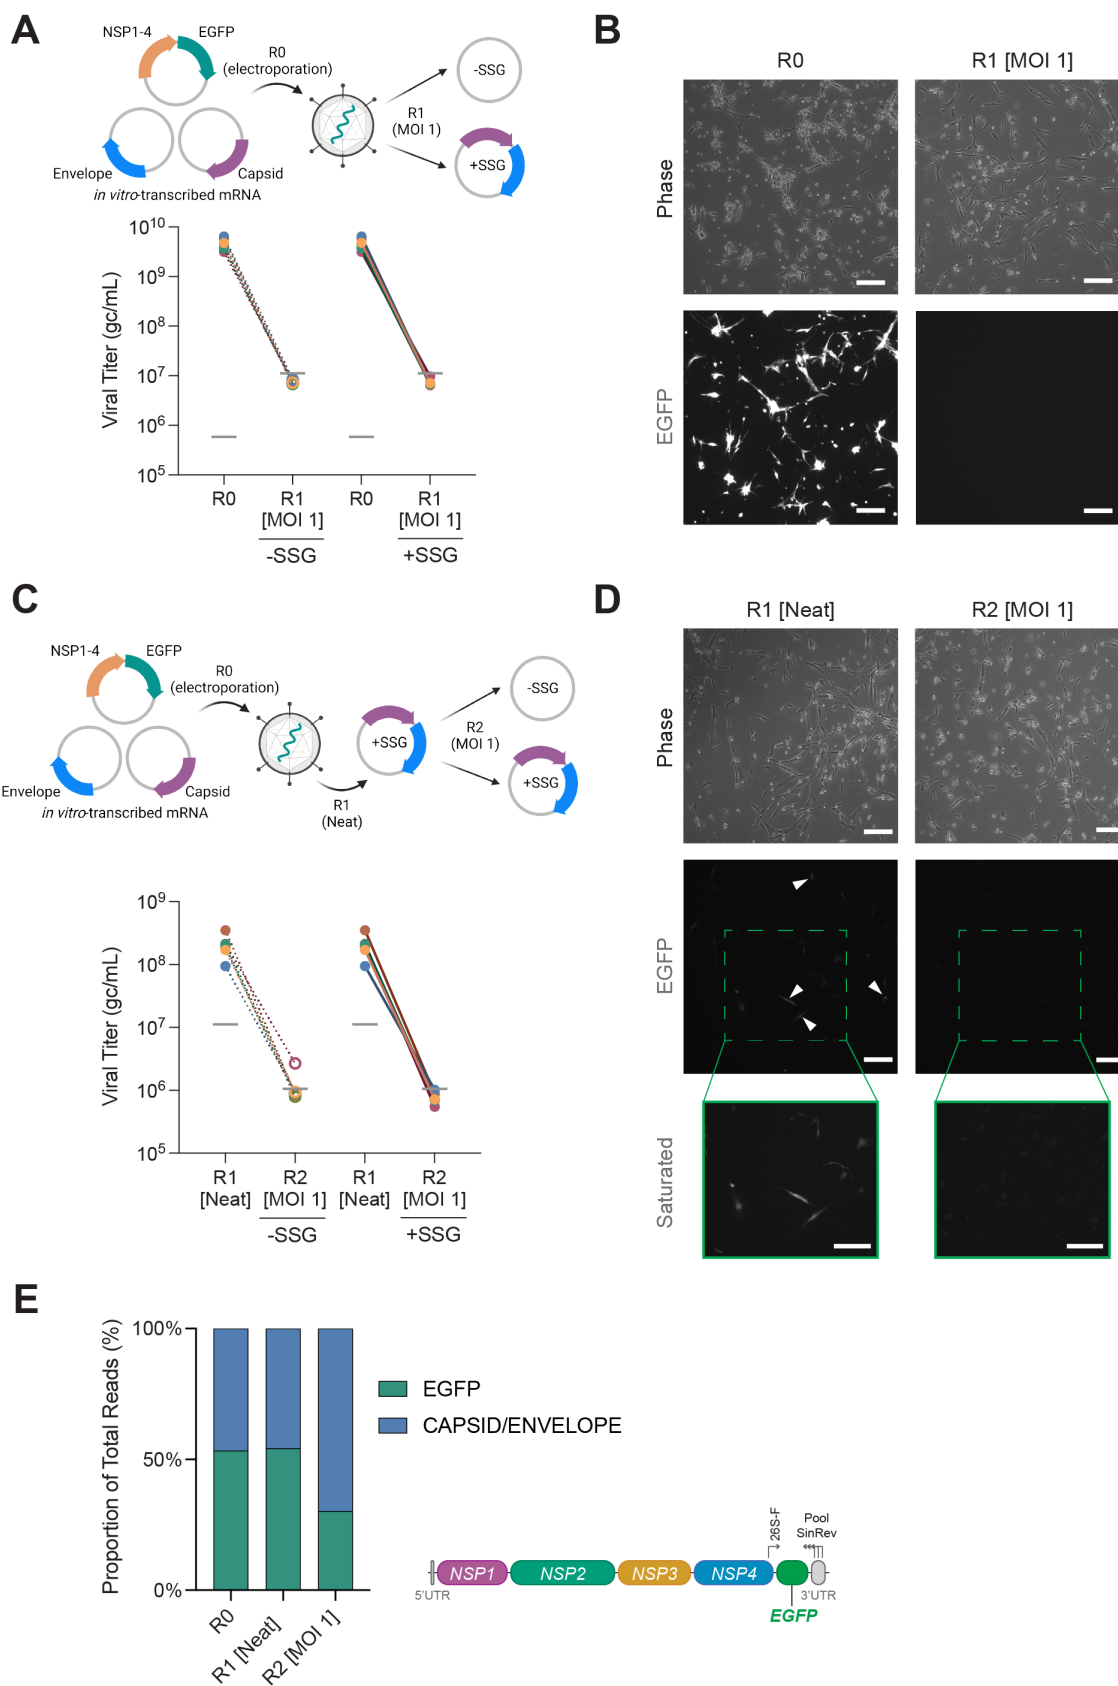

429  
430  
431

**Figure 1**



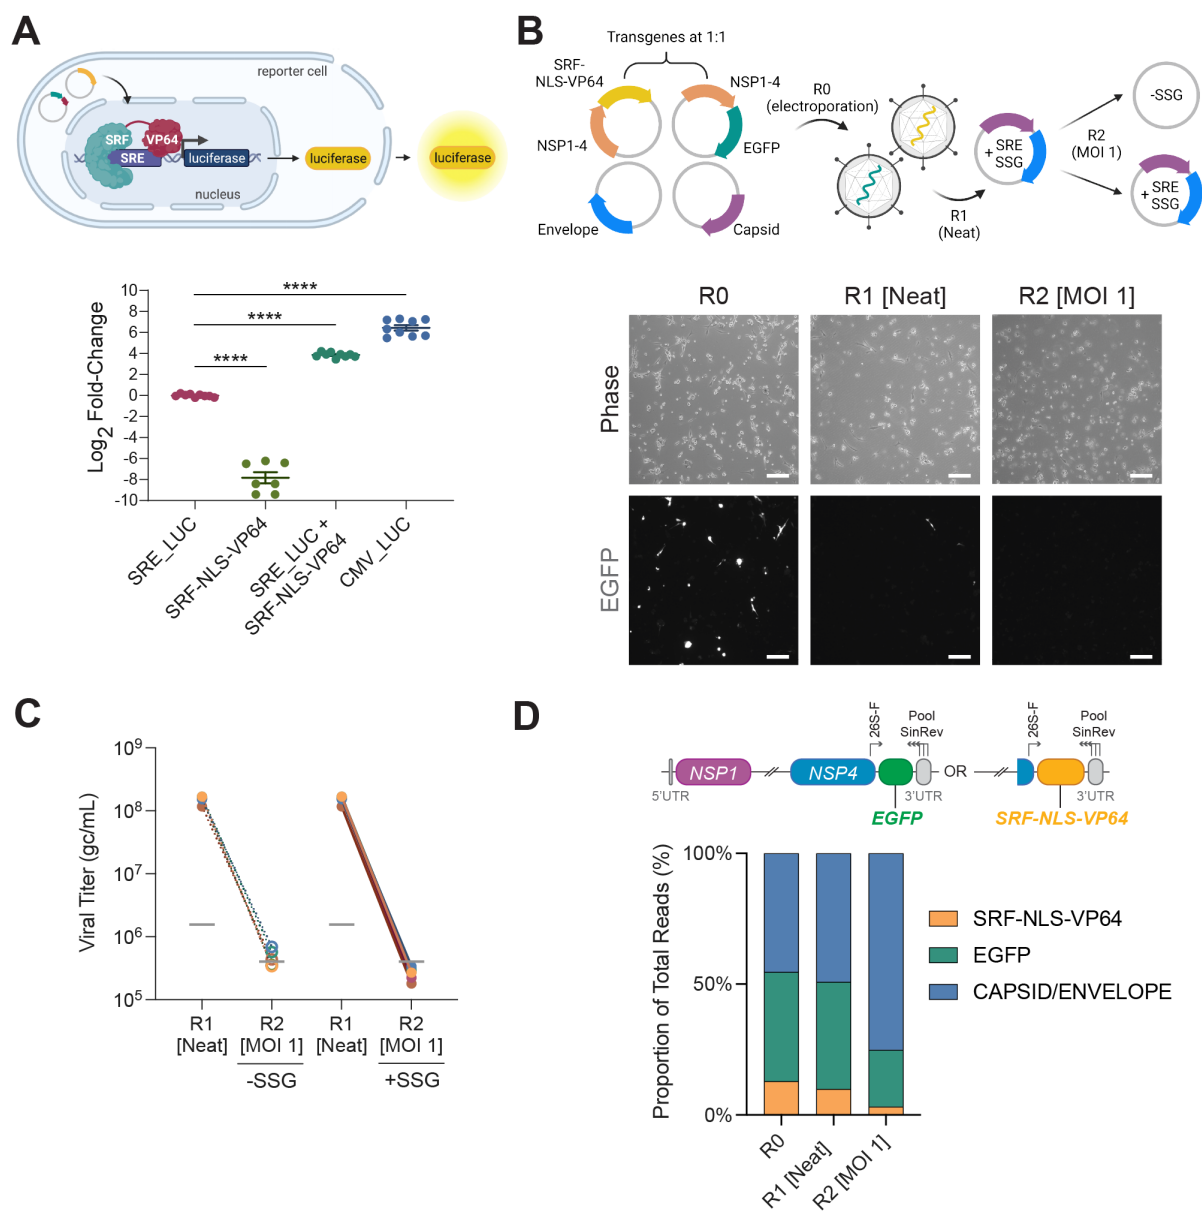

434 **SUPPLEMENTAL FIGURES**

**A**

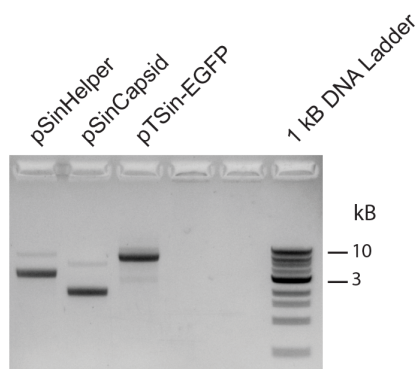

**B**

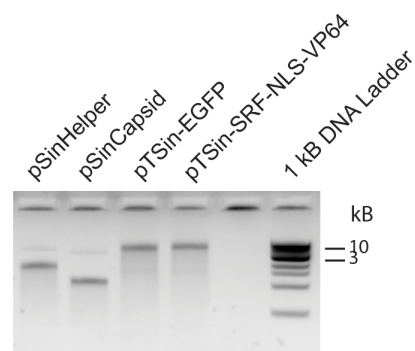

435  
436 **Supplementary Figure 1**

437

**A**

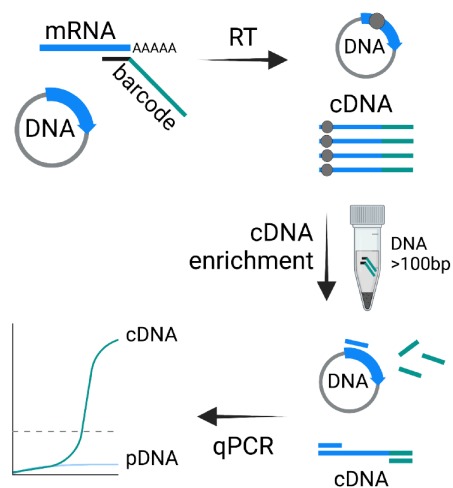

**B**

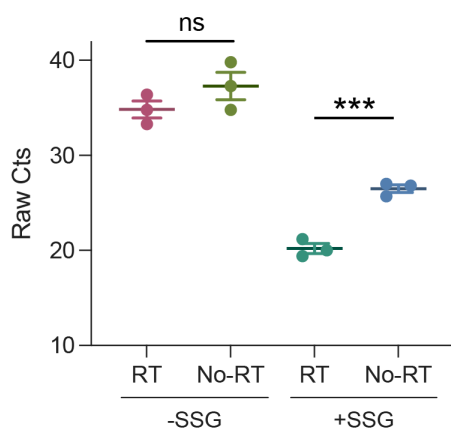

**C**

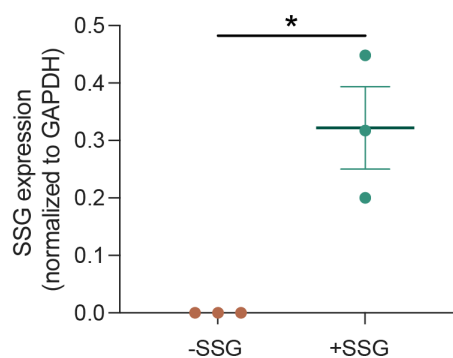

438  
439 **Supplementary Figure 2**

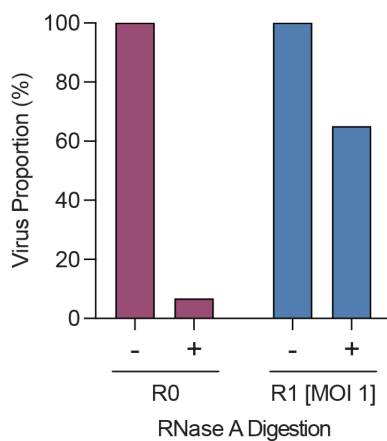

440  
441 **Supplementary Figure 3**  
442

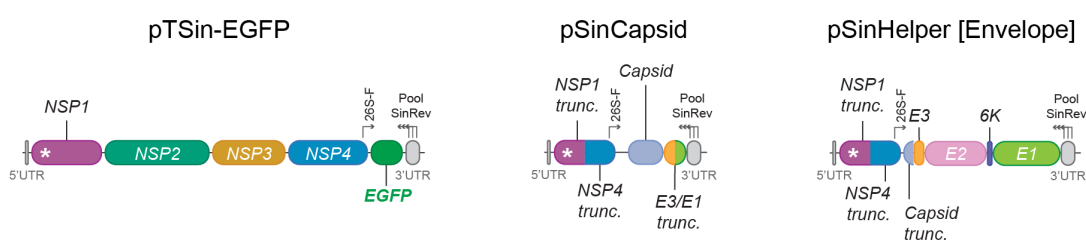

443  
444 **Supplementary Figure 4**  
445

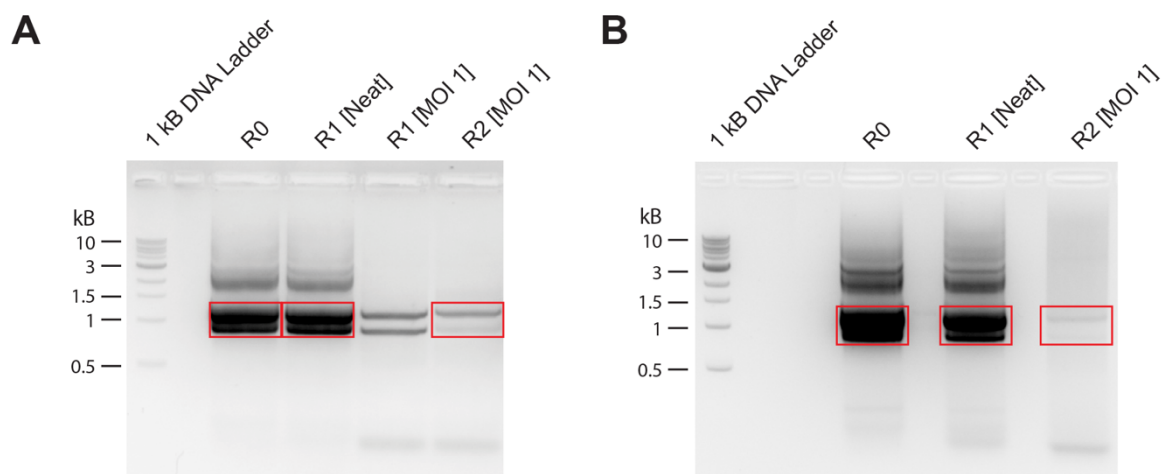

446  
447  
448 **Supplementary Figure 5**

449 **KEY RESOURCES TABLE:**

| <b>REAGENT or RESOURCE</b>                              | <b>SOURCE</b>                | <b>IDENTIFIER</b> |
|---------------------------------------------------------|------------------------------|-------------------|
| <b>Bacterial Strains</b>                                |                              |                   |
| NEB® 10-beta Competent <i>E. coli</i> (High Efficiency) | NEB                          | C3019             |
| <b>Chemicals, Peptides, and Recombinant Proteins</b>    |                              |                   |
| Ampicillin sodium salt                                  | Sigma-Aldrich                | A9518             |
| RNase A                                                 | Macherey-Nagel               | 740505.50         |
| <b>Critical Commercial Assays</b>                       |                              |                   |
| Dual-Glo® Luciferase Assay Kit                          | Promega                      | E2940             |
| FavorPrep™ Blood/Cultured Cell Total RNA Mini Kit       | Fisher Biotec                | FABRK 001-1       |
| iScript™ Select cDNA Synthesis Kit                      | Bio-Rad Laboratories         | 1708897           |
| ISOLATE II PCR and Gel Kit                              | Bioline                      | BIO-52060         |
| ISOLATE II Plasmid Mini Kit                             | Bioline                      | BIO-52057         |
| Ligation Sequencing Kit                                 | Oxford Nanopore Technologies | SQK-LSK109        |
| MagMAX™ Viral RNA Isolation Kit                         | ThermoFisher                 | AM1939            |
| mMESSAGE mMACHINE™ SP6 Transcription Kit                | ThermoFisher                 | AM1340            |
| NEBNext® Companion Module for ONT Ligation Sequencing   | NEB                          | E7180             |
| NEBuilder® HiFi DNA Assembly Master Mix                 | NEB                          | E2621             |
| PureYield™ Plasmid Maxiprep System                      | Promega                      | A2393             |

| <b>REAGENT or RESOURCE</b>                 | <b>SOURCE</b>                | <b>IDENTIFIER</b>                                                                                                     |
|--------------------------------------------|------------------------------|-----------------------------------------------------------------------------------------------------------------------|
| Qubit™ dsDNA HS Assay Kit                  | ThermoFisher                 | Q32851                                                                                                                |
| Qubit™ RNA BR Assay Kit                    | ThermoFisher                 | Q10210                                                                                                                |
| SuperScript™ IV One-Step RT-PCR System     | ThermoFisher                 | 12594025                                                                                                              |
| SYBR™ Select Master Mix                    | ThermoFisher                 | 4472908                                                                                                               |
| TaqMan™ Fast Virus 1-Step Master Mix       | ThermoFisher                 | 4444434                                                                                                               |
| <i>TransIT</i> ®-2020 Transfection Reagent | Mirus Bio                    | MIR5400                                                                                                               |
| Velocity DNA Polymerase                    | Bioline                      | BIO-21099                                                                                                             |
| <b>Deposited Data</b>                      |                              |                                                                                                                       |
| European Nucleotide Archive                | This paper                   | PRJEB47639                                                                                                            |
| <b>Experimental Models: Cell Lines</b>     |                              |                                                                                                                       |
| Hamster: BHK-21 [C-13]                     | ATCC                         | CCL-10                                                                                                                |
| <b>Software and Algorithms</b>             |                              |                                                                                                                       |
| EPI2ME Desktop Agent (Version 3.3.0.1031)  | Oxford Nanopore Technologies | <a href="https://www.nanoporetech.com">https://www.nanoporetech.com</a>                                               |
| GraphPad Prism (Version 9.2.0)             | GraphPad Software            | <a href="https://www.graphpad.com/scientific-software/prism/">https://www.graphpad.com/scientific-software/prism/</a> |
| Guppy (Version 4.5.2)                      | Oxford Nanopore Technologies | <a href="https://www.nanoporetech.com">https://www.nanoporetech.com</a>                                               |
| MinKNOW (Version 4.2.8)                    | Oxford Nanopore Technologies | <a href="https://www.nanoporetech.com">https://www.nanoporetech.com</a>                                               |
| SnapGene® (Version 5.3.2)                  | Insightful Science           | <a href="https://www.snapgene.com">https://www.snapgene.com</a>                                                       |

| <b>REAGENT or RESOURCE</b>                                                        | <b>SOURCE</b>                | <b>IDENTIFIER</b>                                                                 |
|-----------------------------------------------------------------------------------|------------------------------|-----------------------------------------------------------------------------------|
| UMIC-seq                                                                          | GitHub                       | <a href="https://github.com/fhlab/UMIC-seq">https://github.com/fhlab/UMIC-seq</a> |
| Zen 2 Blue Edition (Version 2.0.0.0)                                              | Zeiss                        | <a href="https://www.zeiss.com">https://www.zeiss.com</a>                         |
| <b>Recombinant DNA</b>                                                            |                              |                                                                                   |
| See Supplementary File 1 - Plasmid List. Plasmid maps are available upon request. | N/A                          | N/A                                                                               |
| <b>Oligonucleotides</b>                                                           |                              |                                                                                   |
| See Supplementary File 2 - Primer List.                                           | N/A                          | N/A                                                                               |
| <b>Other</b>                                                                      |                              |                                                                                   |
| 0.45 µm filter                                                                    | Merck Millipore              | SLHV033RS                                                                         |
| 6-well plate                                                                      | Corning                      | 3516                                                                              |
| 96-well plate                                                                     | Corning                      | 3596                                                                              |
| 96-well plate, black-bottom                                                       | Interpath                    | 655209                                                                            |
| AMPure XP Magnetic Beads                                                          | Beckman Coulter              | A63881                                                                            |
| DMEM, high glucose                                                                | ThermoFisher                 | 11965118                                                                          |
| DPBS                                                                              | Sigma-Aldrich                | D8537                                                                             |
| Fetal Bovine Serum (HyClone), AU origin                                           | Cytiva Life Sciences         | SH30084.03                                                                        |
| Flongle Flow Cell (R9.4.1)                                                        | Oxford Nanopore Technologies | FLO-FLG001                                                                        |
| LB Agar                                                                           | ThermoFisher                 | 22700025                                                                          |
| LB Broth                                                                          | ThermoFisher                 | 12795-084                                                                         |

| <b>REAGENT or RESOURCE</b>                             | <b>SOURCE</b> | <b>IDENTIFIER</b> |
|--------------------------------------------------------|---------------|-------------------|
| MEM $\alpha$ with nucleosides                          | ThermoFisher  | 32571101          |
| Opti-MEM Reduced Serum Medium<br>(GlutaMAX Supplement) | ThermoFisher  | 51985034          |
| RNaseOUT Recombinant Ribonuclease<br>Inhibitor         | ThermoFisher  | 10777019          |
| Tryptose Phosphate Broth                               | ThermoFisher  | CM0283B           |
| XbaI                                                   | NEB           | R0145             |

450

451 **REFERENCES**

- 452 Berman, Chet M., Louis J. Papa 3rd, Samuel J. Hendel, Christopher L. Moore, Patreece H.  
453 Suen, Alexander F. Weickhardt, Ngoc-Duc Doan, et al. 2018. “An Adaptable Platform  
454 for Directed Evolution in Human Cells.” *Journal of the American Chemical Society* 140  
455 (51): 18093–103.
- 456 Ekstrom, Marta H., and David A. Dean. 2011. “The Amaxa Nucleofector System and  
457 Standard Electroporation: A Comparison of the Efficiency of DNA Nuclear  
458 Localization.” *Molecular Therapy: The Journal of the American Society of Gene  
459 Therapy* 19 (May): S269–70.
- 460 English, Justin G., Reid H. J. Olsen, Katherine Lansu, Michael Patel, Karoline White, Adam  
461 S. Cockrell, Darshan Singh, Ryan T. Strachan, Daniel Wacker, and Bryan L. Roth. 2019.  
462 “VEGAS as a Platform for Facile Directed Evolution in Mammalian Cells.” *Cell* 178  
463 (3): 748–61.e17.
- 464 Fayzuln, Rafik, Rodion Gorchakov, Olga Petrakova, Evgenia Volkova, and Ilya Frolov.  
465 2005. “Sindbis Virus with a Tricomponent Genome.” *Journal of Virology* 79 (1): 637–  
466 43.
- 467 Shapiro, Jillian S., Andrew Varble, Alissa M. Pham, and Benjamin R. Tenover. 2010.  
468 “Noncanonical Cytoplasmic Processing of Viral microRNAs.” *RNA* 16 (11): 2068–74.
- 469 Thomas, John M., William B. Klimstra, Kate D. Ryman, and Hans W. Heidner. 2003.  
470 “Sindbis Virus Vectors Designed to Express a Foreign Protein as a Cleavable  
471 Component of the Viral Structural Polyprotein.” *Journal of Virology* 77 (10): 5598–  
472 5606.
- 473 Weiss, B., U. Geigenmüller-Gnirke, and S. Schlesinger. 1994. “Interactions between Sindbis  
474 Virus RNAs and a 68 Amino Acid Derivative of the Viral Capsid Protein Further  
475 Defines the Capsid Binding Site.” *Nucleic Acids Research* 22 (5): 780–86.
